# Supplementary material for: AI-based techniques for multi-step streamflow forecasts: Application for multi-objective reservoir operation optimization and performance assessment
Source: Copernicus journal article supplement (doi:10.5194/hess-2020-617), 2020-12-16
Supplement: Supplementary file [file hess-2020-617-AC2-supplement.pdf]

Dear Referee #2,

We highly appreciate your review and useful comments for our manuscript. We provide our answers to your queries below.

Kind regards, all authors

Queries by anonymous referee #2 RC2 & answers by authors are as follows:

**Comment #1:** deterministic S5 performance indicators overlap each other, I would suggest to modify color or width to improve the readability.

**Authors' response:** Thanks for your constructive comments. We will revise this figure as bellows.

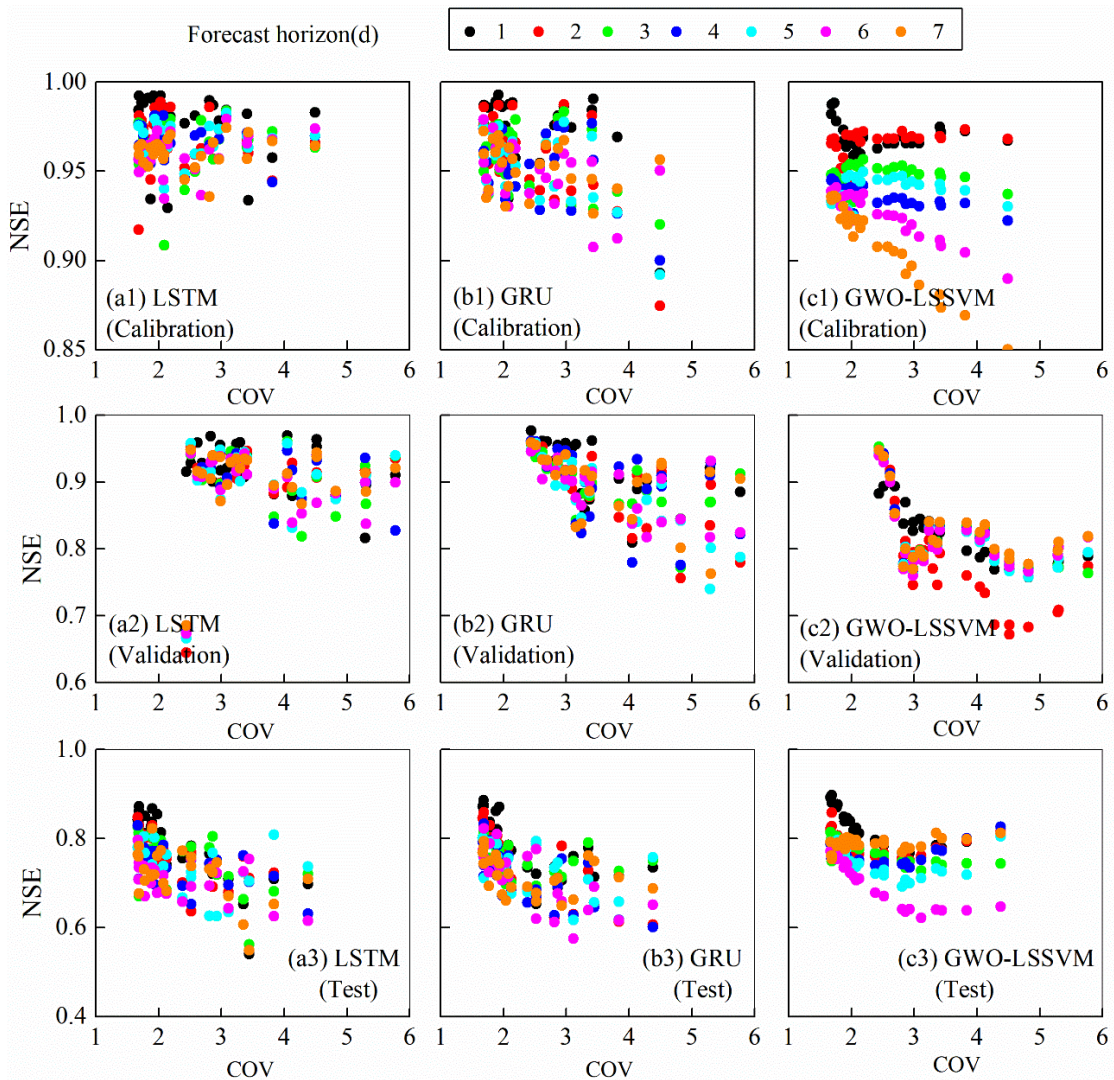

**Figure 6:** NSE values at lead times of 1 to 7 days plotted against the coefficient of variation (COV) for all the 24 reservoirs during the period of (a) calibration, (b) validation, and (c) test under S5.
